# Supplementary material for: Reconfigurable microfluidic dilution for high-throughput quantitative assays
Source: Royal Society of Chemistry journal article supplement (doi:10.1039/c5lc00432b), 2015-01-01
Supplement: c5lc00432b2.pdf [file c5lc00432b2.pdf]

## Electronic Supplementary Information for Reconfigurable Microfluidic Dilution for High-Throughput Quantitative Assays

Jinzhen Fan, Baoqing Li, Siyuan Xing, and Tingrui Pan\*

Micro-Nano Innovations (MiNI) Laboratory, Department of Biomedical Engineering  
University of California, Davis, CA, USA

\*Email: [tingrui@ucdavis.edu](mailto:tingrui@ucdavis.edu)

### Design of Single-Outlet Dilution Chip

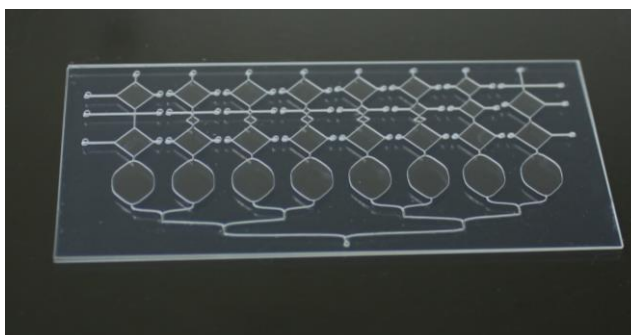

**Fig. S1 Structure of the microfluidic dilution chip with a single outlet.** To minimize manual pipetting steps, we have connected all eight outlets into a single outlet. To solve the unbalanced hydraulic resistances/volumes caused by the metering chambers, Laplace valves have been designed at the exit of each reaction chamber. In brief, with a manual withdraw of 100 $\mu$ L volume from the pipette at the common outlet, it can simultaneously move the metered fluidic contents into the reaction chambers in parallel.

### Fluorescent Dilution Profile

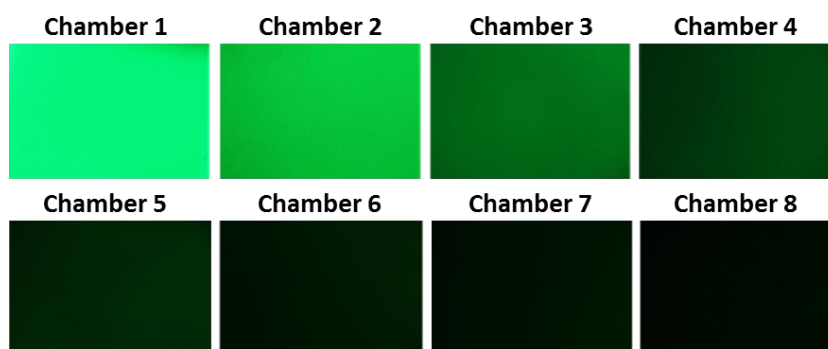

**Fig. S2 Recorded microscopic images in the fluorescent dilution experiment.** In the quantitative dilution experiment, BSA-FITC conjugate was excited by a pulsed high power LED at 490nm (Thorlabs M490L2 and DC2100) passing through a FITC filter set (Thorlabs, MDF-FITC). Filtered fluorescent images shown here were recorded in the centre of each reaction chamber by a CCD sensor of Canon 550D camera (2.5 s, ISO 6400).

### Setup for Bubble-array Microstreaming Mixing

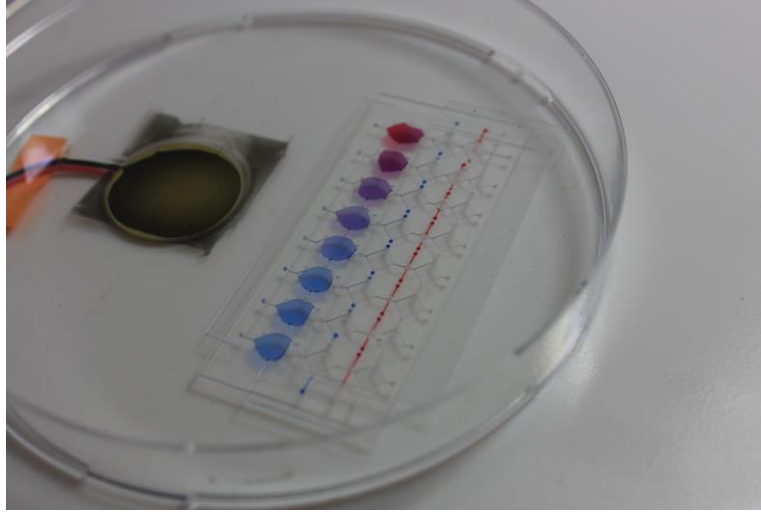

**Fig. S3 Setup for bubble-array microstreaming mixing actuated by a piezoelectric transducer.** For the bubble-induced acoustic microstreaming mixing actuated by a piezoelectric transducer, the microfluidic dilution chip was glued to the surface of a petri dish, with embedded air pockets surrounding the individual reaction chambers. A piezoelectric transducer of 15 mm in radius was also glue-bonded to the backside of the petri dish to produce the acoustic actuation.
